# Supplementary material for: A NIR fluorescent probe for the detection and visualization of hydrogen sulfide using the aldehyde group assisted thiolysis of dinitrophenyl ether strategy
Source: Royal Society of Chemistry journal article supplement (doi:10.1039/c8tb02218f), 2018-01-01
Supplement: c8tb02218f1.pdf [file c8tb02218f1.pdf]

## Supporting Information

### **A NIR fluorescent probe for the detection and visualization of hydrogen sulfide using aldehyde group assisted thiolysis of dinitrophenyl ether strategy**

Ming Qian<sup>†‡</sup>, Liuwei Zhang<sup>‡</sup>, Zhongji Pu<sup>‡</sup>, Jing Xia<sup>‡</sup>, Lili Chen<sup>‡</sup>, Ying Xia<sup>‡</sup>, Hongyan Cui<sup>‡</sup>,  
Jingyun Wang<sup>†‡\*</sup>, Xiaojun Peng<sup>†</sup>

<sup>†</sup>State Key Laboratory of Fine Chemicals, Dalian University of Technology, 116024, Dalian, Liaoning, P. R. China

<sup>‡</sup>School of Life Science and Biotechnology, Dalian University of Technology, 116024, Dalian, Liaoning, P.R. China

## List of contents

**Scheme S1** The synthesis procedure of intermediates.

**Table S1** A comparison of NIR fluorescent probes for H<sub>2</sub>S.

**Table S2** The photophysical properties of **NDCM-CHO-OH** in different co-solvents.

**Figure S1** The optical spectra of **NDCM-OH** and **NDCM-CHO-OH**.

**Figure S2** The optical spectra of **NDCM-CHO-OH** and **NDCM-OH** in different solvents.

**Figure S3** The fluorescence spectra for the verification of the reaction product.

**Figure S4** The absorption response behavior of **NDCM-2** toward H<sub>2</sub>S.

**Figure S5** The fluorescence response of probe **NDCM-2** (10 μM) toward different concentrations of H<sub>2</sub>S.

**Figure S6** The HRMS for the verification of the sensing mechanism.

**Figure S7** <sup>1</sup>H NMR for the verification of the sensing mechanism.

**Figure S8** The selectivity of **NDCM-2** toward H<sub>2</sub>S over various biological related analytes.

**Figure S9** The selectivity of **NDCM-2** toward H<sub>2</sub>S over biothiols.

**Figure S10** Density functional theory (DFT) calculation of **NDCM-1** and **NDCM-OH**.

**Figure S11** Effect of pH on **NDCM-2** and its sensing performance toward H<sub>2</sub>S.

**Figure S12** Photobleaching curves of **NDCM-2**.

**Figure S13** Evaluating the preservation stability of probe **NDCM-2**.

**Figure S14** Cytotoxicity of the probe **NDCM-2** on HeLa cells.

**Figure S15** The confocal fluorescence imaging of the basal H<sub>2</sub>S in four different cells.

**Figure S16** The co-staining experiment of **NDCM-2** with Hoechst 33342.

**Figure S17** The co-staining experiment of **NDCM-2** with Lyso tracker red.

**Figure S18** Fluorescence images of **NDCM-2** against different concentration of exogenous H<sub>2</sub>S

**Figure S19** Evaluating the photostability of **NDCM-2** in the sensing process against H<sub>2</sub>S in living HeLa cells.

**Figure S20- Figure S34** Structure verification of the synthesized compound by MS and NMR.

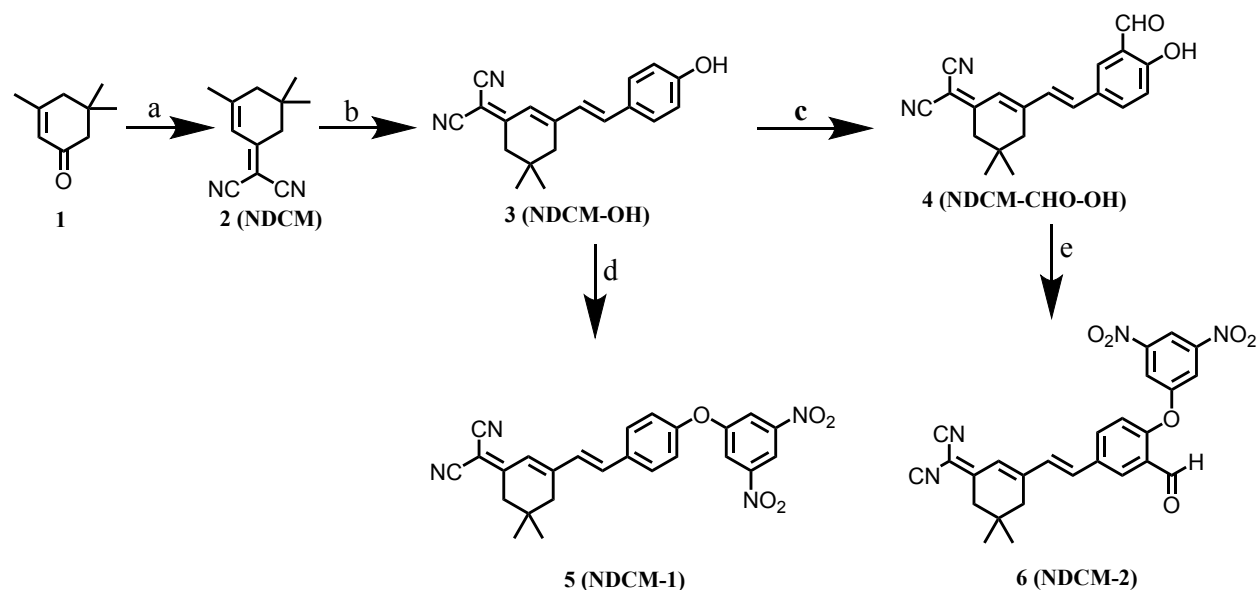

**Scheme S1.** The synthetic route of the probe. Reaction conditions: (a) malononitrile, piperidine, glacial acetic acid, EtOH, reflux, N<sub>2</sub> protection; (b) p-hydroxybenzaldehyde, piperidine, acetonitrile, reflux, N<sub>2</sub> protection; (c) Hexamethylenetetramine, trifluoroacetic acid, reflux; (d) DIEPA, 2,4-dinitrofluorobenzene, dry CH<sub>2</sub>Cl<sub>2</sub>, room temperature. (e) DIEPA, 2,4-dinitrofluorobenzene, dry CH<sub>2</sub>Cl<sub>2</sub>, room temperature.

### The synthesis of NDCM

Isophorone (2.3 g, 16.7 mmol), malononitrile (1.32 g, 20.0 mmol), piperidine (0.2 mL, 2.0 mmol) and glacial acetic acid (0.10 g, 1.6 mmol) were dissolved in 100 mL EtOH, Then, the mixture was refluxed for 6 h under argon atmosphere. After the solvent was removed, the residue was dissolved with CH<sub>2</sub>Cl<sub>2</sub>, washed with water, and dried over Na<sub>2</sub>SO<sub>4</sub>. Finally, the solvent was evaporated under reduced pressure, and the crude product was purified by silica column chromatography (petroleum/dichloromethane = 1:2, v/v) to give a white solid (2.1 g, 67.7%). <sup>1</sup>H NMR (400 MHz, DMSO):  $\delta$  6.56 (d, J = 1.2 Hz, 1H), 2.53 (s, 2H), 2.23 (s, 2H), 2.05 (s, 3H), 0.95 (s, 6H). <sup>13</sup>C NMR (126 MHz, DMSO): 171.28, 162.37, 119.38, 113.42, 112.63, 76.08, 44.69, 41.71, 31.87, 27.04, 24.99. HRMS: calculated for [M-H]<sup>-</sup>: 185.1079; found: 185.1089.

### The synthesis of NDCM-OH

NDCM (1 g, 5.4 mmol), p-hydroxybenzaldehyde (732 mg, 6.0 mmol), five drops of piperidine were dissolved in 40 mL anhydrous acetonitrile. The mixture was refluxed for 5 h under argon atmosphere. Subsequently, the solvent was removed under reduced pressure. The resulting residue

was dissolved in 20 mL dichloromethane, washed with water for three times, and dried over anhydrous Na<sub>2</sub>SO<sub>4</sub>. After the removal of the solvent, the crude product was purified by silica column chromatography (dichloromethane: acetic ether = 100:1) to afford the **NDCM-OH** as a red solid (1.17 g, 75%). <sup>1</sup>H NMR (400 MHz, DMSO): δ 9.98 (s, 1H), 7.55 (d, J = 8.7 Hz, 2H), 7.29 – 7.14 (m, 2H), 6.83 ~ 6.76 (m, 3H), 2.59 (s, 2H), 2.53 (s, 2H), 1.01 (s, 6H). <sup>13</sup>C NMR (126 MHz, DMSO): δ 170.23, 159.31, 156.67, 138.25, 129.83, 127.10, 126.22, 121.34, 115.85, 114.09, 113.27, 74.79, 42.31, 38.19, 31.62, 27.41. HRMS: calculated for [M-H]<sup>-</sup>: 289.1341; found: 289.1351

### The synthesis of **NDCM-CHO-OH**

Hexamethylenetetramine (168 mg, 1.2 mmol) was added to solution of **NDCM-OH** (290.0 mg, 1.0 mmol) in trifluoroacetic acid (10 mL). The mixture was refluxed for 5 h. After complete reaction, the solvent was evaporated under a rotary evaporator, diluted with water and then neutralized with NaOH until the pH reached 7.0. Subsequently, the solution was extracted with dichloromethane. The organic layer was washed with water for three times, dried over anhydrous sodium sulfate. The crude product was purified by silica gel column chromatography with dichloromethane as the eluent to afford **NDCM-CHO-OH** as a yellow solid (116.6 mg, 43%). <sup>1</sup>H NMR (400 MHz, DMSO): δ 11.15 (s, 1H), 10.29 (s, 1H), 7.97 (d, J = 2.2 Hz, 1H), 7.89 (dd, J = 8.7, 2.2 Hz, 1H), 7.37 ~ 7.25 (m, 2H), 7.04 (d, J = 8.6 Hz, 1H), 6.88 (s, 1H), 2.61 (s, 2H), 2.53 (s, 2H), 1.01 (s, 6H). <sup>13</sup>C NMR (126 MHz, DMSO): δ 190.63, 170.27, 161.87, 156.09, 136.69, 134.96, 128.75, 127.96, 127.64, 122.62, 122.19, 118.08, 113.92, 113.08, 75.75, 42.27, 38.14, 31.62, 27.41. HRMS: calculated for [M-H]<sup>-</sup>: 317.1290; found: 317.1293.

### The synthesis of **NDCM-1**

The control compound **NDCM-1** was synthesized according to the similar synthesis procedure of **NDCM-2** using **NDCM-OH** as the reactant. <sup>1</sup>H NMR (500 MHz, DMSO-d<sub>6</sub>): δ 10.18 (s, 1H), 8.93 (d, J = 2.7 Hz, 1H), 8.47 (dd, J = 9.2, 2.8 Hz, 1H), 8.30 (d, J = 1.9 Hz, 1H), 8.10 (dd, J = 8.6, 1.9 Hz, 1H), 7.57 (d, J = 16.2 Hz, 1H), 7.46~7.29 (m, 3H), 6.96 (s, 1H), 2.63 (s, 2H), 2.55 (s, 2H), 1.02 (s, 6H). <sup>13</sup>C NMR (DMSO-d<sub>6</sub>): δ 170.26, 155.57, 154.64, 154.33, 141.77, 139.68, 136.08, 133.91, 130.05, 129.97, 129.65, 123.03, 121.89, 120.40, 120.06, 113.76, 112.95, 76.54, 42.28, 38.17, 31.65, 27.41. HRMS: calculated for [M-H]<sup>-</sup>: 455.1356; found: 455.1368.

**Table S1.** A comparison of NIR fluorescent probes for H<sub>2</sub>S.

| Probe                                                                                                                              | Properties                                                       | Stokes shift | Fluorescence enhancement | Response time | Detection limit | Applications                 |
|------------------------------------------------------------------------------------------------------------------------------------|------------------------------------------------------------------|--------------|--------------------------|---------------|-----------------|------------------------------|
| 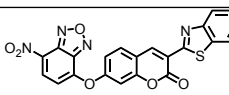<br>Analytica Chimica Acta<br>896 (2015) 128-136  | Abs: 450 nm<br>Em 490 nm<br><br>Two-photon                       | 40 nm        | 35-fold                  | 2 min         | 120 nM          | Cells and tissues            |
| <br>Sensors and Actuators B<br>221 (2015) 951-955 | Abs: 450 nm<br><br>Em: 612 nm                                    | 162 nm       | 112-fold                 | 30 min        | 90 nM           | Cells                        |
| <br>Anal. Chem. 2016, 88,<br>5476-5481           | Abs:<br>394/520 nm<br><br>Em 532 nm<br><br>Mitochondria-Targeted | 138 nm       | 68-fold                  | 40 min        | 2.46 μM         | Cells                        |
| <br>Chem. Commun. 2013,<br>49, 3890-3892.       | Abs :520 nm<br>Em:670 nm<br><br>NIR emission                     | 150 nm       | 65-fold                  | 60 min        | 3.05 μM         | Cells                        |
| <br>Sci. Rep. 2017, 7, 12944.                   | Abs :440 nm<br>Em:545 nm<br><br>ER Targeted                      | 105 nm       | 45-fold                  | 30 min        | 7.77 μM         | Cells, tissues and zebrafish |
| <br>Sci. Rep. 2016, 6, 18868.                   | Abs :670 nm<br>Em:723 nm<br><br>NIR excitation and emission      | 53 nm        | 50-fold                  | 20 min        | 38 nM           | Cells and mice               |

|                                                                                                                                   |                                                                    |        |               |         |           |                         |
|-----------------------------------------------------------------------------------------------------------------------------------|--------------------------------------------------------------------|--------|---------------|---------|-----------|-------------------------|
| 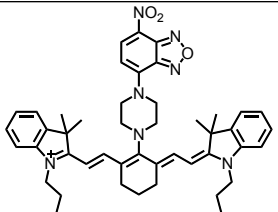<br>Chem. Sci. 2017, 8, 2776–2781.               | Abs: 740 nm<br>Em: 796 nm<br><br>NIR excitation and emission       | 56 nm  | 87-fold       | 30 min  | 39.6 nM   | Cells and mice          |
| <br>Sensors and Actuators B 232 (2016) 705–711   | Abs: 370 nm<br>Em: 424 nm                                          | 54 nm  | 200-fold      | 180 min | 90 nM     | Cells                   |
| <br>Sensors and Actuators B 255 (2018) 2347–2355 | Abs: 518 nm<br>Em: 655 nm<br><br>NIR emission                      | 137 nm | 32-fold       | 8 min   | 83 nM     | Cells                   |
| <br>Biosens. Bioelectron. 2017, 89, 919–926.    | Abs: 680 nm<br>Em: 720 nm<br>NIR excitation and emission           | 40 nm  | 20-fold       | 30 min  | 260 nM    | Cells and mice          |
| <br>Dyes Pigm. 2018, 153, 206–212.             | Abs: 560 nm<br>Em: 680 nm<br><br>NIR emission                      | 130 nm | About 25-fold | 30 min  | 1.1 nM    | Cells                   |
| <br>Sensors and Actuators B 261 (2018) 51–57   | Abs: 452 nm<br>Em: 552 nm<br><br>Two photon Ratio metric detection | 100 nm | Not mentioned | 5 min   | 0.24 μM   | Cells                   |
| <br><b>This work</b>                           | Abs: 490 nm<br>Em: 660 nm<br><br>NIR emission                      | 170 nm | 160-fold      | 15 min  | 58.797 nM | Cells, tissues and mice |

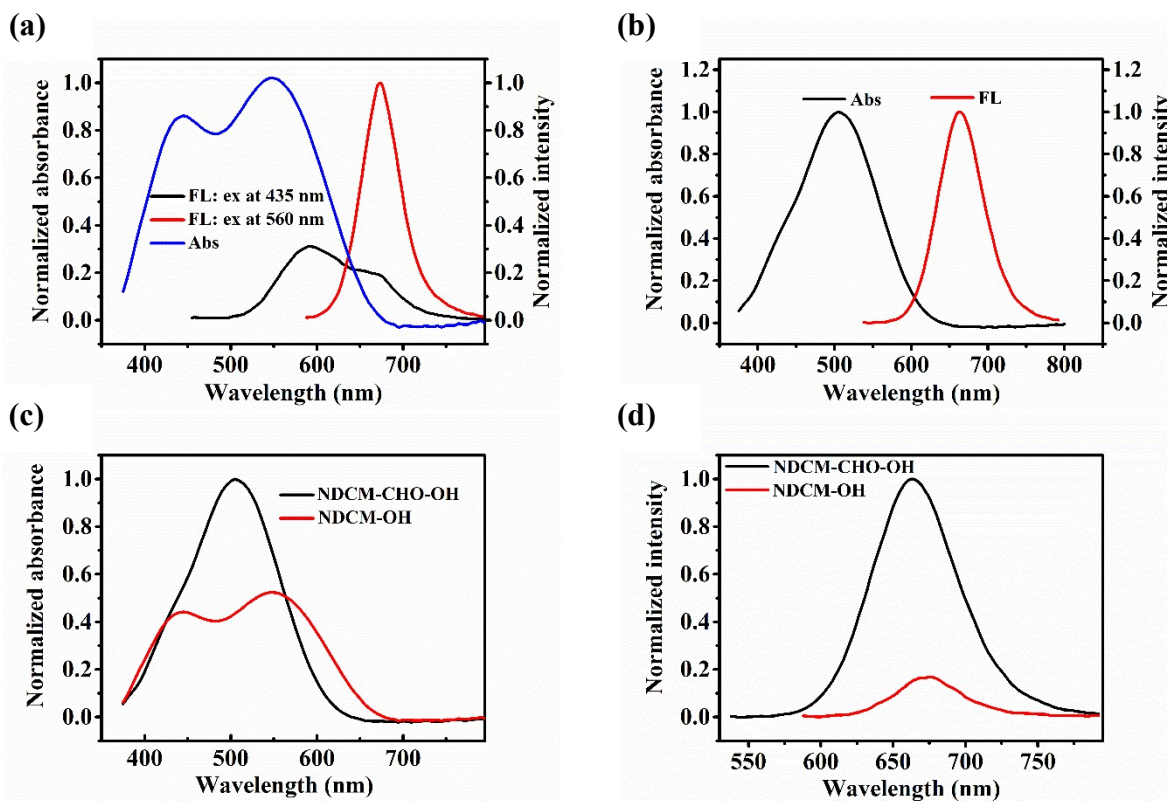

**Figure S1.** The spectra of **NDCM-OH** and **NDCM-CHO-OH** in PBS-DMSO solution (pH=7.4, 1:1). (a) The normalized spectra of **NDCM-OH**. (b) The normalized spectra of **NDCM-CHO-OH**. (c) Comparison of two fluorophores in absorbance. (d) Comparison of two fluorophores in fluorescence emission.

**Table S2.** The photophysical properties of fluorophore **NDCM-CHO-OH** in different co-solvents (PBS solution with addition of 50% organic solvents).

| solvents                | $\lambda_{\max}$ (nm) | $\epsilon_{\max}$ ( $\times 10^4$ ) | $\lambda_{\text{em}}$ (nm) | $\Phi$   | $\delta$ shift(nm) |
|-------------------------|-----------------------|-------------------------------------|----------------------------|----------|--------------------|
| <b>CH<sub>3</sub>CN</b> | 490                   | 4.01                                | 660                        | 0.233777 | 170                |
| <b>DMSO</b>             | 505                   | 4.53                                | 664                        | 0.381135 | 159                |
| <b>Acetone</b>          | 505                   | 4.38                                | 664                        | 0.157977 | 159                |
| <b>DMF</b>              | 510                   | 4.72                                | 664                        | 0.368865 | 154                |
| <b>CH<sub>3</sub>OH</b> | 485                   | 4.32                                | 652                        | 0.200058 | 167                |
| <b>THF</b>              | 525                   | 4.19                                | 666                        | 0.233269 | 141                |
| <b>1,4-Dioxane</b>      | 505                   | 4.45                                | 662                        | 0.279373 | 157                |
| <b>EtOH</b>             | 500                   | 4.74                                | 658                        | 0.215895 | 158                |

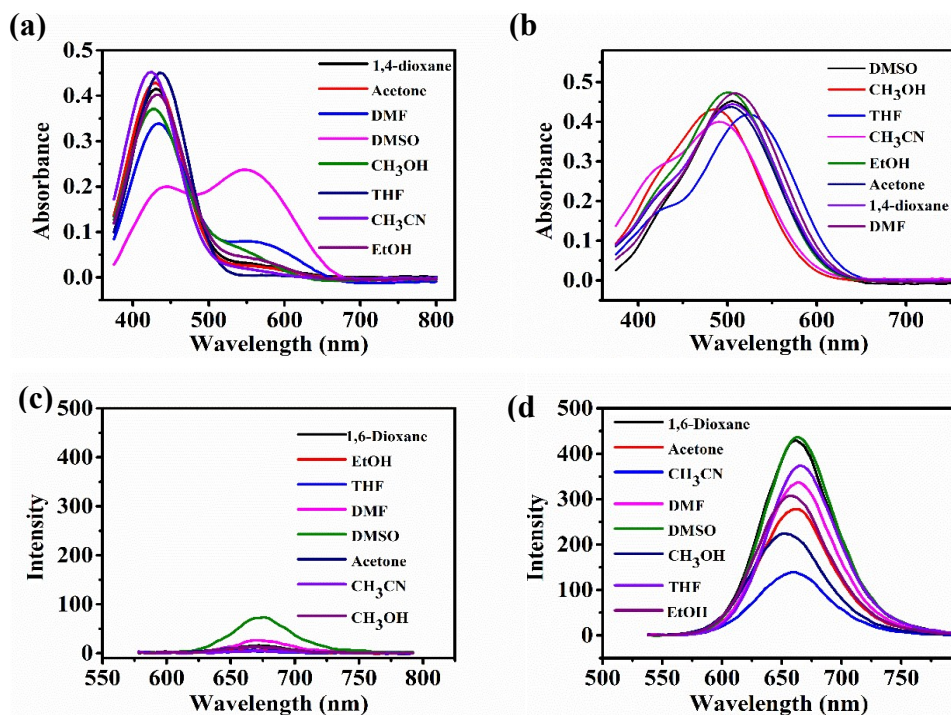

**Figure S2.** The optical spectra of fluorophore **NDCM-CHO-OH** and **NDCM-OH** in different co-solvents (PBS solution with addition of 50% organic solvents). (a) The absorption spectrum of **NDCM-OH** in different co-solvents. (b) The absorption spectrum of **NDCM-CHO-OH** in different co-solvents. (c) The fluorescence spectrum of **NDCM-OH** in different co-solvents. (d) The fluorescence spectrum of **NDCM-CHO-OH** in different co-solvents.

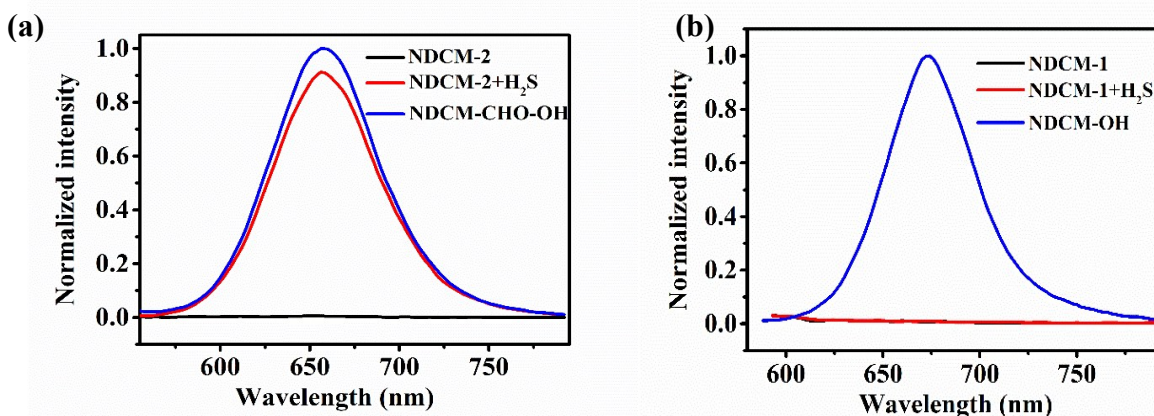

**Figure S3.** The spectra for the verification of the reaction product. (a) The fluorescence spectra of **NDCM-2** (10  $\mu$ M), **NDCM-2** (10  $\mu$ M) + 100  $\mu$ M Na<sub>2</sub>S and **NDCM-CHO-OH** (10  $\mu$ M) in PBS-CH<sub>3</sub>CN solution (pH 7.4, 1:1), excitation wavelength: 490 nm. (b) The fluorescence spectra of **NDCM-1** (10  $\mu$ M), **NDCM-1** (10  $\mu$ M) + 100  $\mu$ M Na<sub>2</sub>S and **NDCM-OH** (10  $\mu$ M) in PBS-CH<sub>3</sub>CN solution (pH 7.4, 1:1), excitation wavelength: 490 nm.



$\mu\text{M}$ ) +  $100 \mu\text{M Na}_2\text{S}$  and **NDCM-OH** ( $10 \mu\text{M}$ ) in PBS-DMSO solution (pH 7.4, 1:1), excitation wavelength: 560 nm.

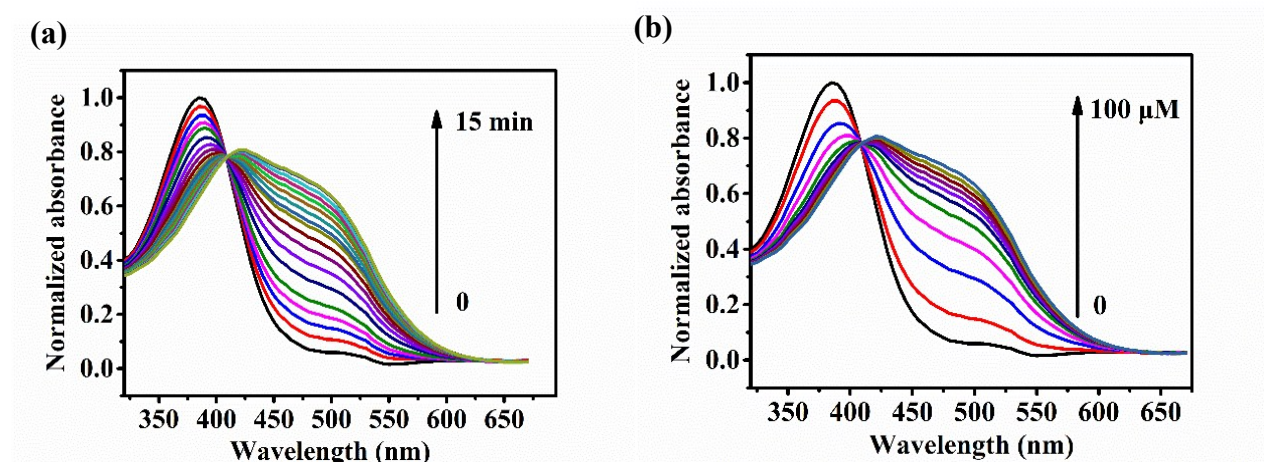

**Figure S4.** The absorption response behavior toward  $\text{H}_2\text{S}$  in PBS- $\text{CH}_3\text{CN}$  solution (pH=7.4, 1:1). (a) The time-dependent normalized absorption spectra change in 15 min upon the addition of  $100 \mu\text{M Na}_2\text{S}$ . (b) The normalized absorption spectra change of **NDCM-2** toward different  $\text{Na}_2\text{S}$  concentration (0, 10, 20, 30, 40, 50, 60, 70, 80, 90,  $100 \mu\text{M}$ ) for 15 min. Excitation wavelength: 490 nm.

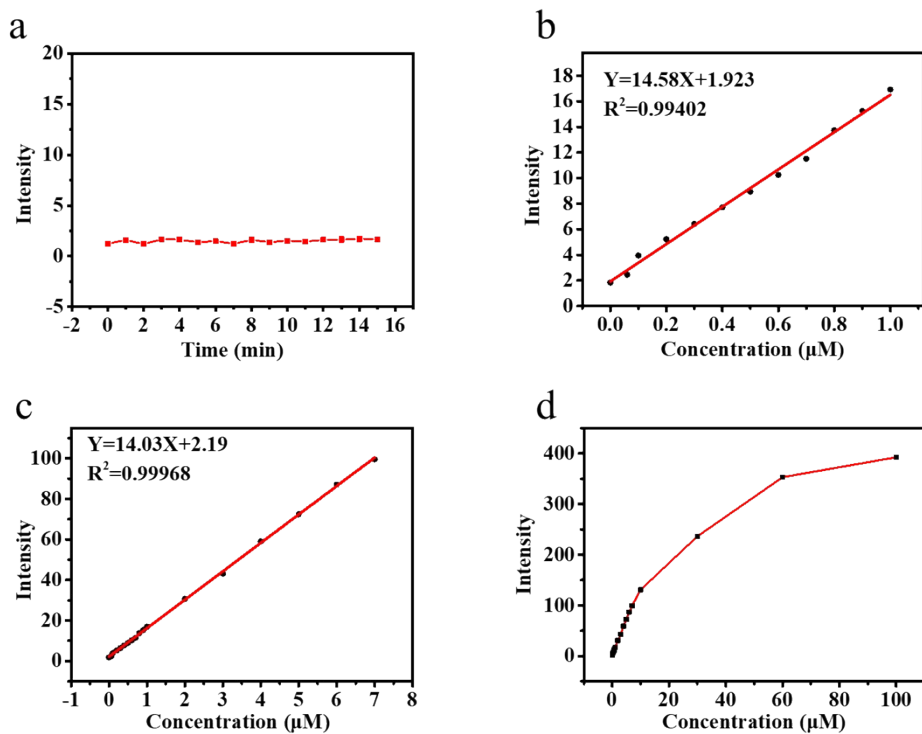

**Figure S5.** Fluorescence response of probe **NDCM-2** (10  $\mu\text{M}$ ) toward different concentrations of  $\text{Na}_2\text{S}$ . (a) The time-dependent fluorescence intensity (660 nm) change of **NDCM-2** without the addition of  $\text{Na}_2\text{S}$ . (b) The linear relationship between the fluorescence intensity (660 nm) and extremely low  $\text{Na}_2\text{S}$  concentration (0, 0.06, 0.1, 0.2, 0.3, 0.4, 0.5, 0.6, 0.7, 0.8, 0.9, 1  $\mu\text{M}$ ). (c) The linear relationship between the fluorescence intensity (660 nm) and low  $\text{Na}_2\text{S}$  concentration (0, 0.06, 0.1, 0.2, 0.3, 0.4, 0.5, 0.6, 0.7, 0.8, 0.9, 1, 2, 3, 4, 5, 6, 7  $\mu\text{M}$ ). (d) The fluorescence intensity (660 nm) change of **NDCM-2** toward various  $\text{Na}_2\text{S}$  concentration (0, 0.06, 0.1, 0.2, 0.3, 0.4, 0.5, 0.6, 0.7, 0.8, 0.9, 1, 2, 3, 4, 5, 6, 7, 10, 30, 60, 100  $\mu\text{M}$ ). Excitation wavelength: 490 nm.

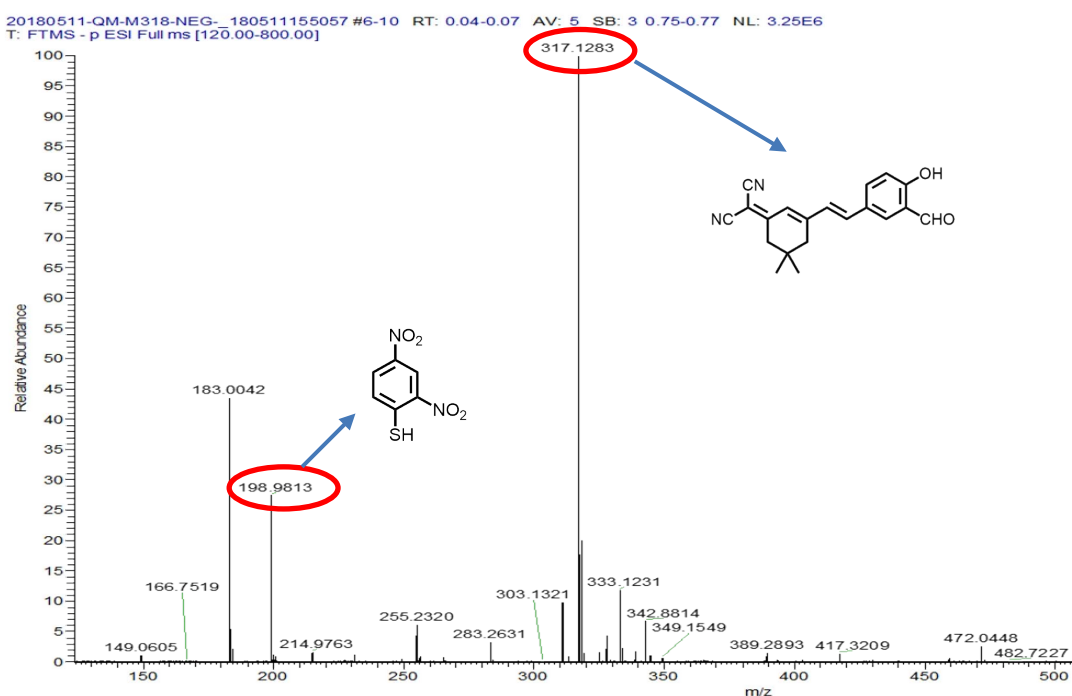

**Figure S6.** Verifying the sensing mechanism of **NDCM-2** toward  $\text{H}_2\text{S}$  by HRMS.

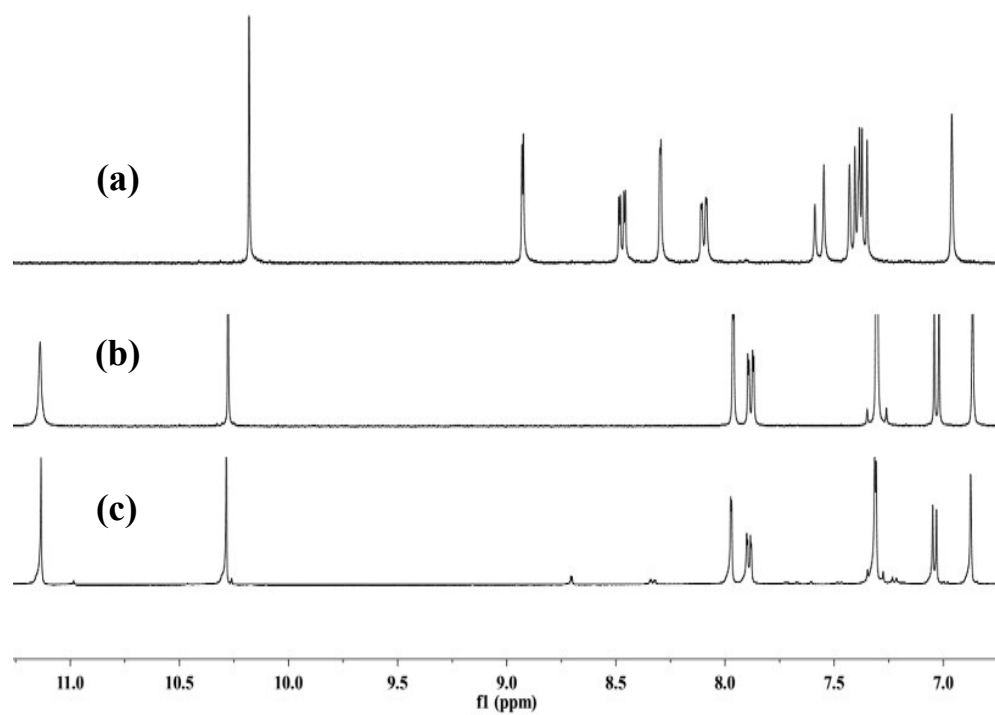

**Figure S7.** <sup>1</sup>H NMR for the verification of the sensing mechanism. (a) <sup>1</sup>H NMR spectra (δ 6.5~11.5) of **NDCM-2**. (b) The fluorophore **NDCM-CHO-OH**. (c) The isolated product of **NDCM-2** + Na<sub>2</sub>S.

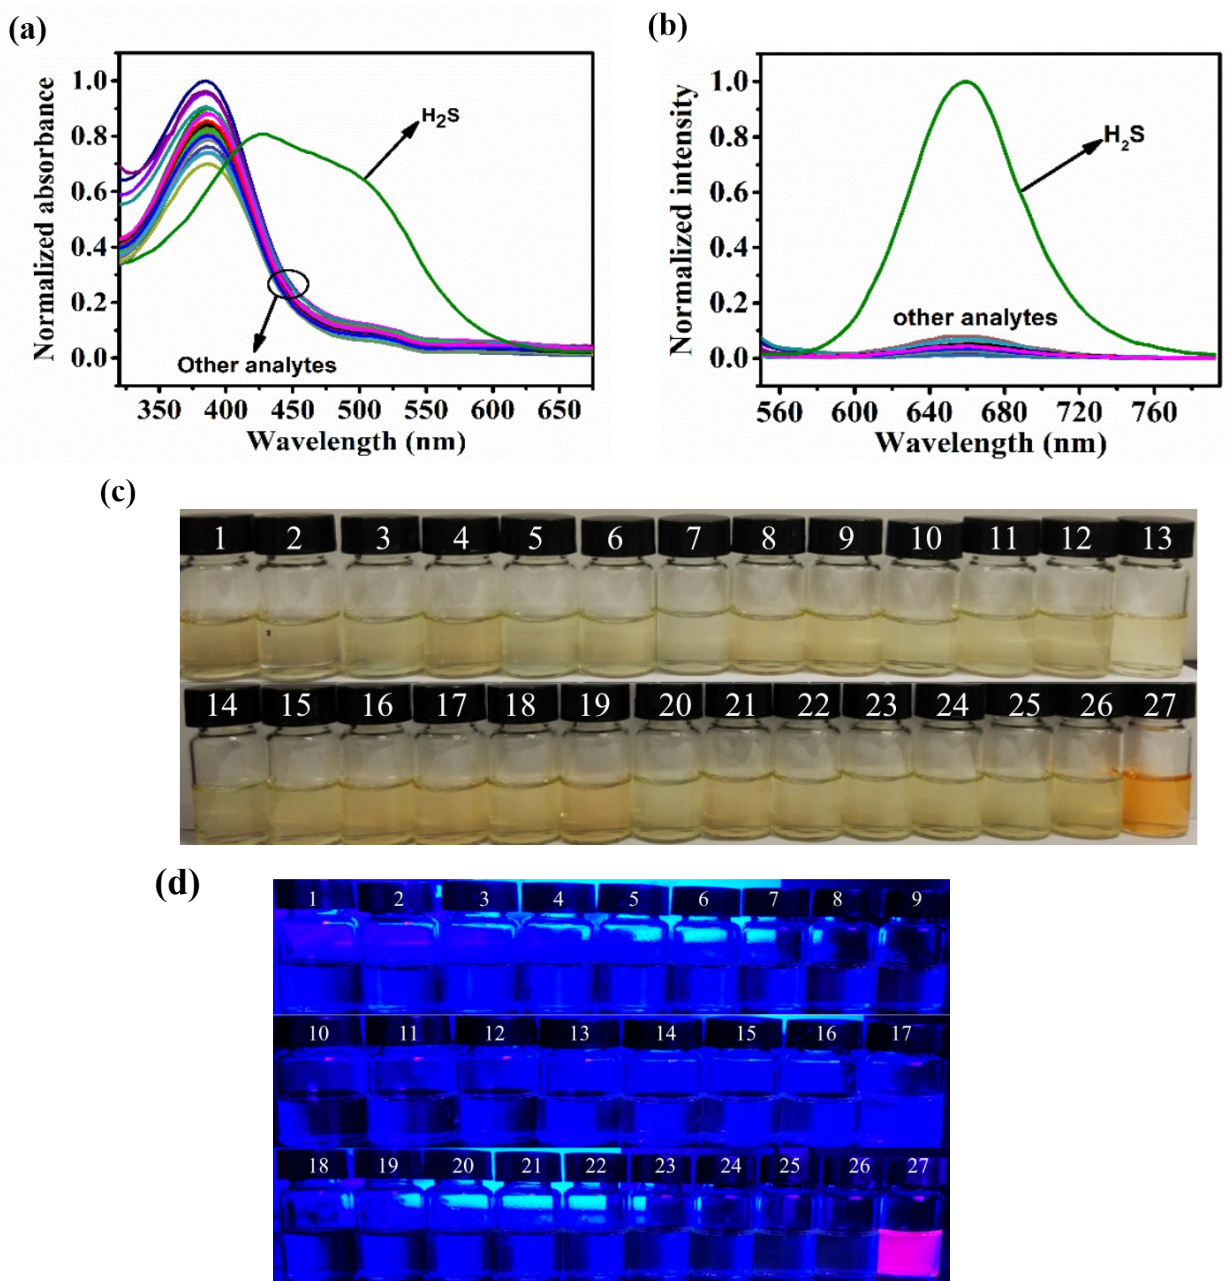

**Figure S8.** The selectivity of **NDCM-2** toward  $\text{H}_2\text{S}$  over various biological related analytes. (a) Absorption spectra change of **NDCM-2** ( $10\ \mu\text{M}$ ) toward various analytes ( $\text{Na}_2\text{S}$ :  $100\ \mu\text{M}$ , other analytes:  $1\ \text{mM}$ ) in PBS- $\text{CH}_3\text{CN}$  solution (pH 7.4, 1:1). (b) Fluorescence spectra change of probe **NDCM-2** ( $10\ \mu\text{M}$ ) toward various analytes ( $\text{Na}_2\text{S}$ :  $100\ \mu\text{M}$ , other analytes:  $1\ \text{mM}$ ) in PBS- $\text{CH}_3\text{CN}$  solution (pH 7.4, 1:1). (c) Color changes of probe **NDCM-2** ( $10\ \mu\text{M}$ ) upon the addition of various analytes ( $100\ \mu\text{M}$  for  $\text{Na}_2\text{S}$  and  $1\ \text{mM}$  for other analytes) under bright field. (d) Fluorescence color changes of probe **NDCM-2** ( $10\ \mu\text{M}$ ) upon the addition of various analytes ( $100\ \mu\text{M}$  for  $\text{Na}_2\text{S}$  and  $1\ \text{mM}$  for other analytes) under a  $365\ \text{nm}$  UV-lamp. 1:

HCO<sub>3</sub><sup>-</sup>, 2: HPO<sub>4</sub><sup>-</sup>, 3: Glucose, 4: Zn<sup>2+</sup>, 5: AcO<sup>-</sup>, 6: Ni<sup>2+</sup>, 7: Cl<sup>-</sup>, 8: N<sub>3</sub><sup>-</sup>, 9: I<sup>-</sup>, 10: S<sub>2</sub>O<sub>3</sub><sup>2-</sup>, 11: Citrate, 12: SO<sub>4</sub><sup>2-</sup>, 13: NO<sub>3</sub><sup>-</sup>, 14: S<sub>2</sub>O<sub>7</sub><sup>2-</sup>, 15: SO<sub>3</sub><sup>2-</sup>, 16: Pro, 17: Met, 18: Val, 19: Leu, 20: Ser, 21: Glu, 22: Ala, 23: Cys, 24: GSH, 25: Hcy, 26: H<sub>2</sub>O<sub>2</sub>, 27: Na<sub>2</sub>S. Excitation wavelength: 490 nm.

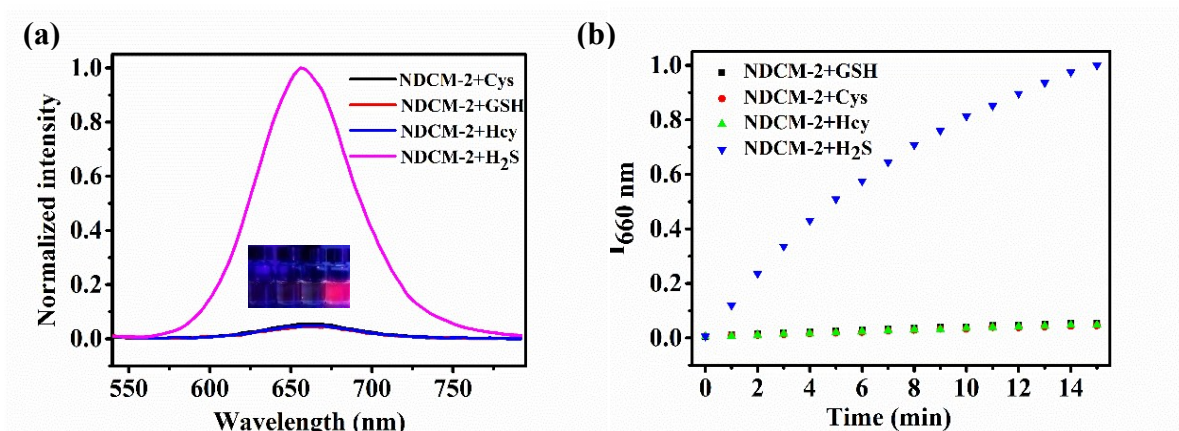

**Figure S9.** The selectivity of **NDCM-2** toward H<sub>2</sub>S over biothiols (GSH, Hcy, Cys) in PBS-CH<sub>3</sub>CN solution (pH=7.4, 1:1). (a) The normalized fluorescence spectra change of **NDCM-2** upon addition of Na<sub>2</sub>S (100 μM) and three biothiols (100 μM), inset: the color change of **NDCM-2** toward Na<sub>2</sub>S and three biothiols under UV Lamp (365 nm). (b) The normalized fluorescence intensity at 660 nm changed with time upon addition of 100 μM Na<sub>2</sub>S and 100 μM GSH, Hcy, Cys. The excitation wavelength: 490 nm.

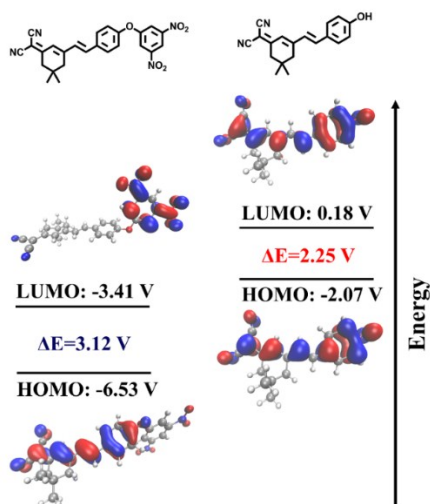

**Figure S10.** Density functional theory (DFT) optimized structures and frontier molecular orbitals (MOs) of **NDCM-1** and **NDCM-OH**. The calculations were obtained by DFT at the B3LYP/6-311G (d, p)/level using Gaussian 16 program.

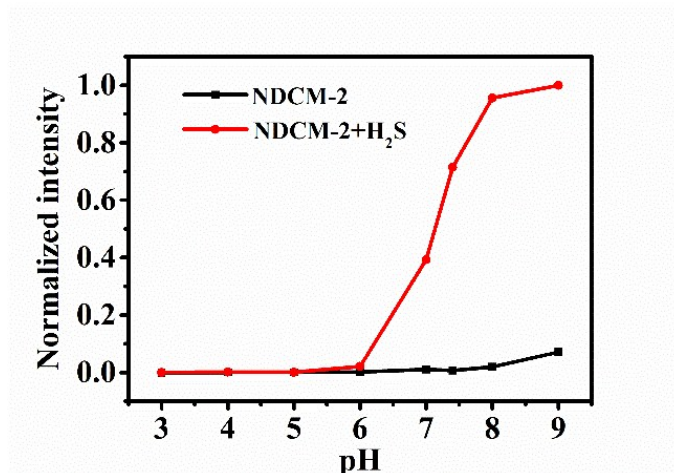

**Figure S11.** Fluorescence intensity of probe **NDCM-2** (10  $\mu\text{M}$ ) at 660 nm under different pH values (from 3.0 to 9.0) in the absence and presence of  $\text{Na}_2\text{S}$  (100  $\mu\text{M}$ ). Excitation wavelength: 490 nm.

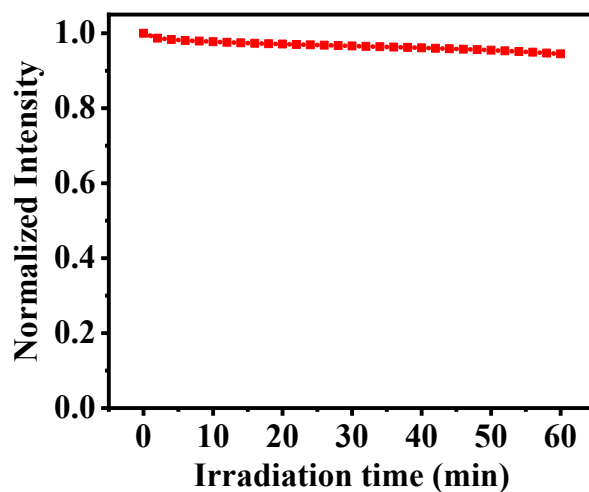

**Figure S12.** Photobleaching curves for the final reaction solution of **NDCM-2** and 100  $\mu\text{M}$   $\text{H}_2\text{S}$  exposed to the light irradiation under the high voltage mode (800 V) of fluorescence spectrophotometer.

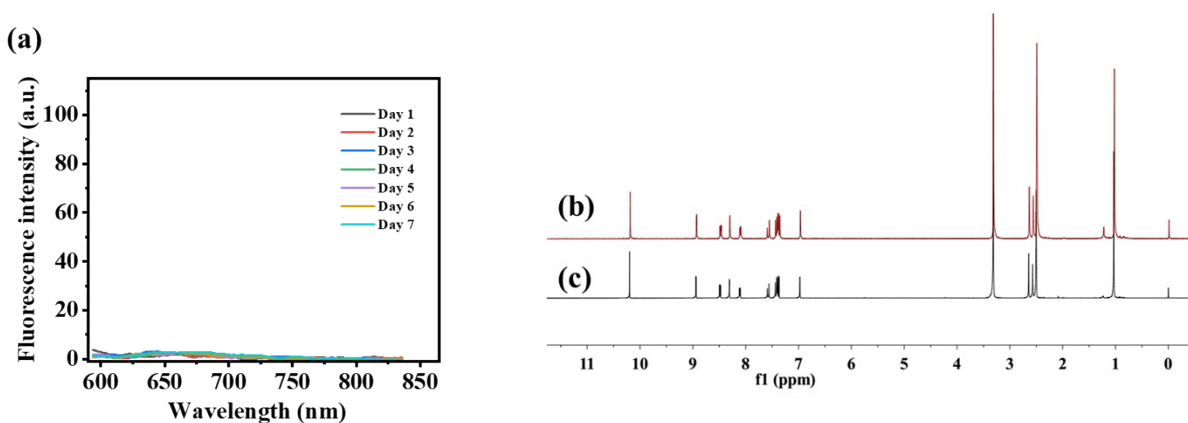

**Figure S13.** Evaluating the preservation stability of probe **NDCM-2**. (a) Fluorescence spectra change of the stock solution of probe **NDCM-2** (10  $\mu\text{M}$ ) in the preservation time period of 0-7 days. Excitation wavelength: 490 nm. (b-c) The NMR spectra comparison of **NDCM-2** before and after preservation for four months. The spectrum of (c) was measured after the preservation of pure **NDCM-2** solid in refrigerator for four months.

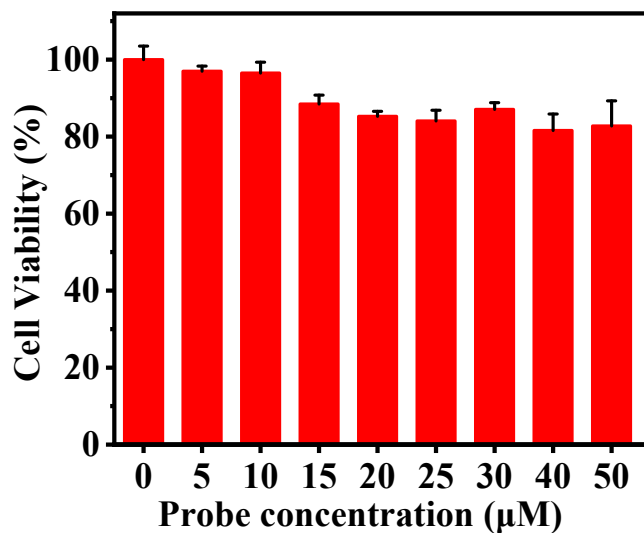

**Figure S14.** Cytotoxicity of the probe **NDCM-2** against HeLa cells evaluated by a standard MTT assay, the data are presented as mean  $\pm$  S.D.

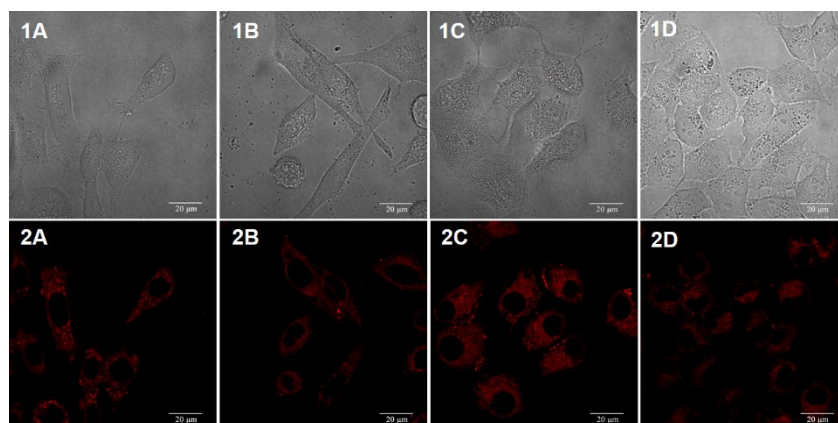

**Figure S15.** The confocal fluorescence imaging of the basal  $H_2S$  in four different cells using probe **NDCM-2** ( $10 \mu M$ ). (2A) COS-7 cells. (2B) MCF-7 cells. (2C) HepG-2 cells. (2D) HeLa cells. 1A, 1B, 1C, and 1D are the corresponding bright-field image of 2A, 2B, 2C, and 2D. The fluorescence images were obtained by collecting the emissions ranging from 620 to 720 nm upon excitation at 488 nm. Scar bar= $20 \mu m$ .

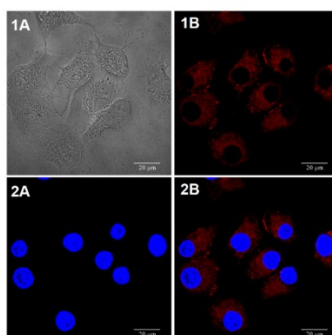

**Figure S16.** The co-staining experiments of **NDCM-2** ( $10 \mu M$ ) in HepG-2 cells using Hoechst 33342 as the nucleus staining dyes. (1A): Bright field. (1B): Fluorescence imaging of basal  $H_2S$  using **NDCM-2**. (2A): Fluorescence imaging of Hoechst 33342. (2B): Merge of (1B) and (2A). Excitation wavelength: 405 nm for Hoechst 33342 and 488 nm for **NDCM-2**. The fluorescence images of **NDCM-2** were obtained by collecting the emissions at 620-720 nm upon excitation at 488 nm and the fluorescence images of Hoechst 33342 were obtained by collecting the emissions at 420-520 nm. Scar bar= $20 \mu m$ .



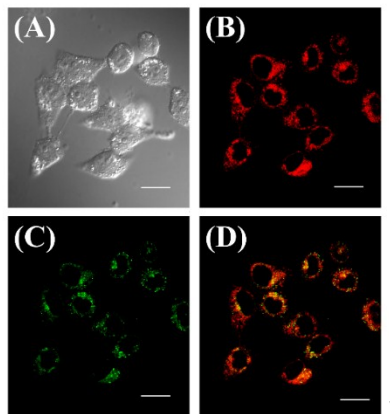

**Figure S17** The co-staining experiments of **NDCM-2** (10  $\mu\text{M}$ ) in HeLa cells using Lyso-tracker red as the specific lysosome staining dyes. (A): Bright field. (B): Fluorescence images of **NDCM-2** against 100 $\mu\text{M}$  exogenous  $\text{H}_2\text{S}$ . (C): Fluorescence images of Lyso-tracker red. (D): Merge of (B) and (C). Excitation wavelength: 559 nm for Lyso-tracker red and 488 nm for **NDCM-2**. The fluorescence images of **NDCM-2** and Lyso tracker red were obtained by collecting the emissions at 620-720 nm and 560-600 nm with confocal laser scanning microscopy (Olympus, FV1000-IX81), respectively. Scar bar=20  $\mu\text{m}$ .

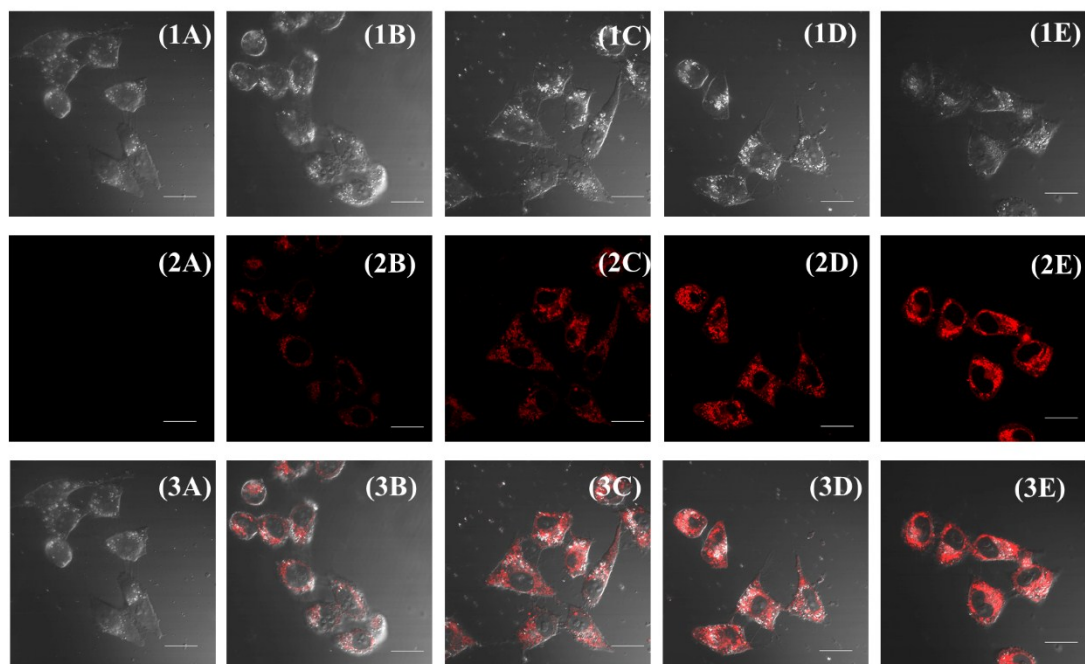

**Figure S18.** Fluorescence images of **NDCM-2** against different concentration of exogenous  $\text{H}_2\text{S}$  (0, 2  $\mu\text{M}$ , 20  $\mu\text{M}$ , 50  $\mu\text{M}$ , 100  $\mu\text{M}$ ) in living HeLa cells. (2A): PPG (1 mM) pre-treated cells were incubated with 10  $\mu\text{M}$  **NDCM-2** for 30 min only. (2B-2E): PPG (1 mM) pre-treated cells were incubated with 5  $\mu\text{M}$ , 20  $\mu\text{M}$ ,

50  $\mu\text{M}$ , 100  $\mu\text{M}$   $\text{Na}_2\text{S}$  for 30 min respectively, then incubated with 10  $\mu\text{M}$  **NDCM-2** for 30 min. (1A-1E) and (3A-3E) are the corresponding bright field and merge field of (2A-2E), respectively. The fluorescence images were obtained by collecting the emissions at 620-720 nm under the excitation wavelength of 488 nm with confocal laser scanning microscopy (Olympus, FV1000-IX81). Scar bar=20  $\mu\text{m}$ .

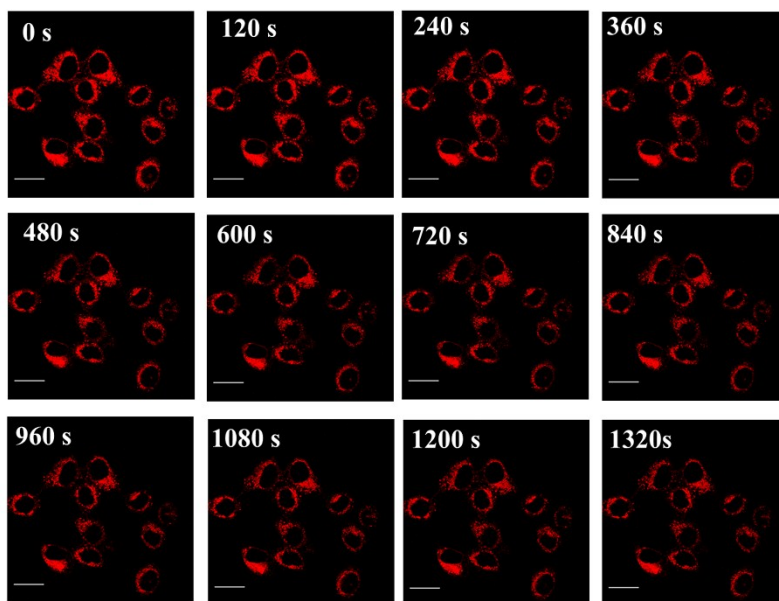

**Figure S19.** Evaluating the photostability of probe **NDCM-2** in the sensing process against  $\text{H}_2\text{S}$  in living HeLa cells. The cells were incubated with 100  $\mu\text{M}$   $\text{H}_2\text{S}$  at 37  $^\circ\text{C}$  for 30 min, followed by the incubation of 10  $\mu\text{M}$  **NDCM-2** for 30 min at 37  $^\circ\text{C}$ . Images were taken by confocal fluorescent microscopy (Olympus, FV1000-IX81) for different times (0, 120s, 240s, 360s, 480s, 600s, 720s, 840s, 960s, 1080s, 1200s, 1320s) with the excitation at 488 nm and the emission collection range from 620 to 700 nm. Scale bar=20  $\mu\text{m}$ .

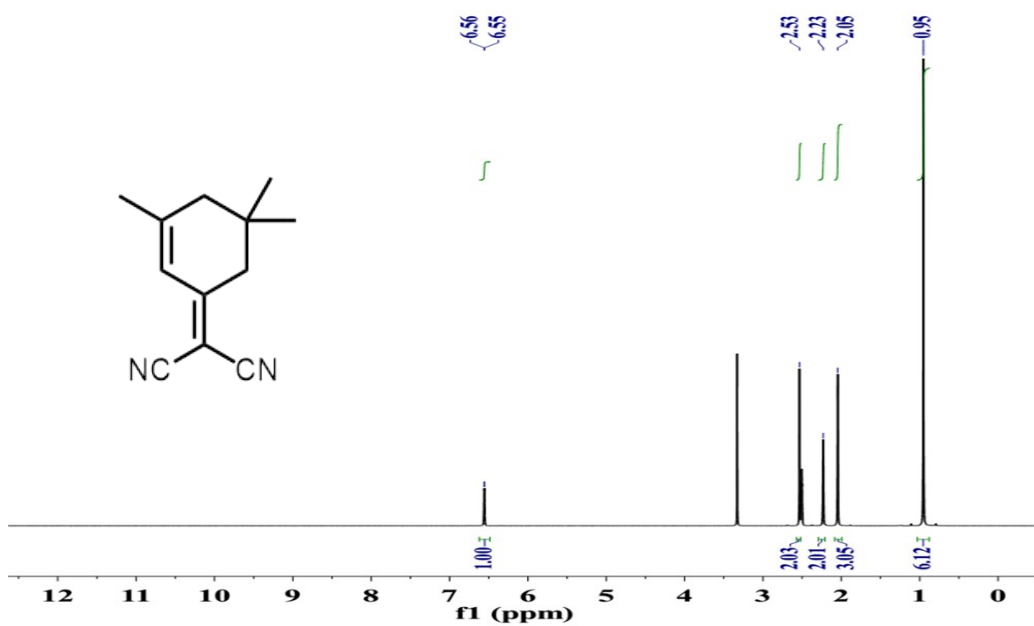

Figure S20. <sup>1</sup>H NMR spectra of NDCM in DMSO-d<sub>6</sub>

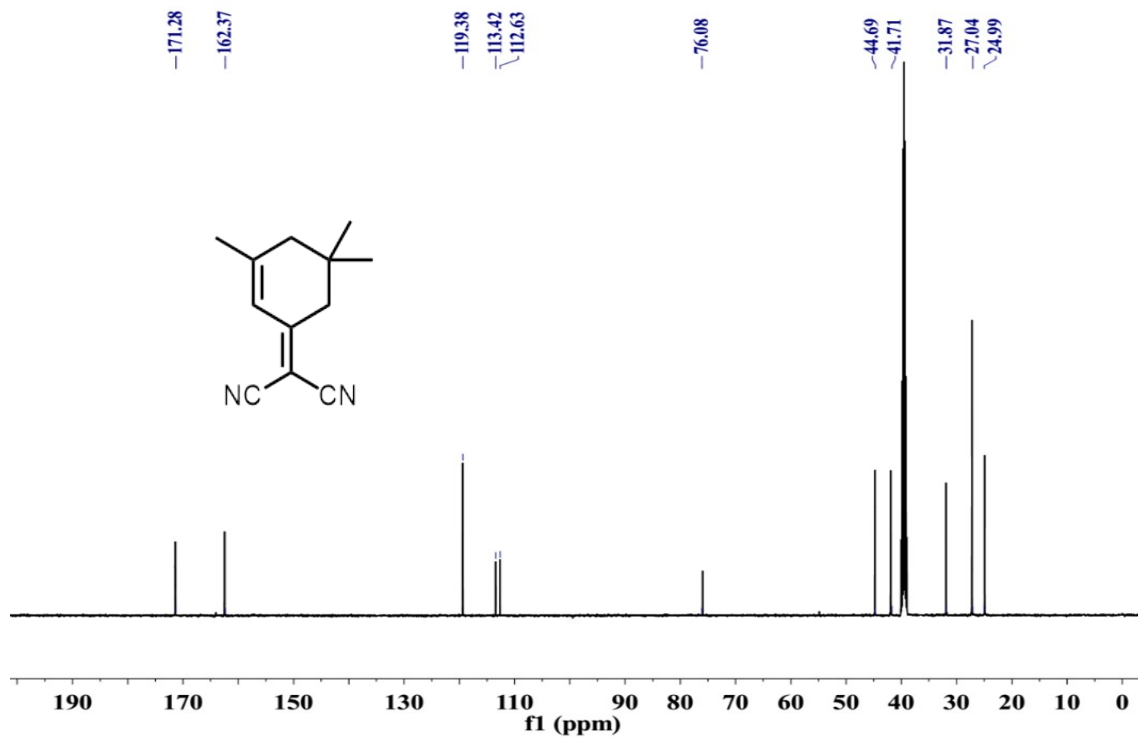

Figure S21. <sup>13</sup>C NMR spectra of NDCM in DMSO-d<sub>6</sub>

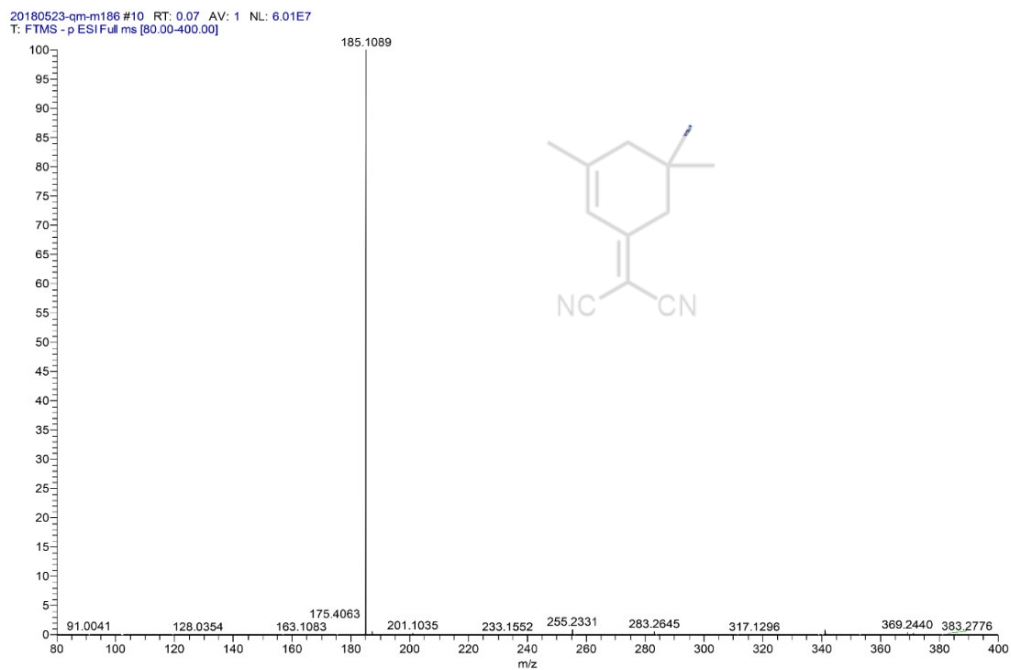

Figure S22. HRMS spectra of NDCM

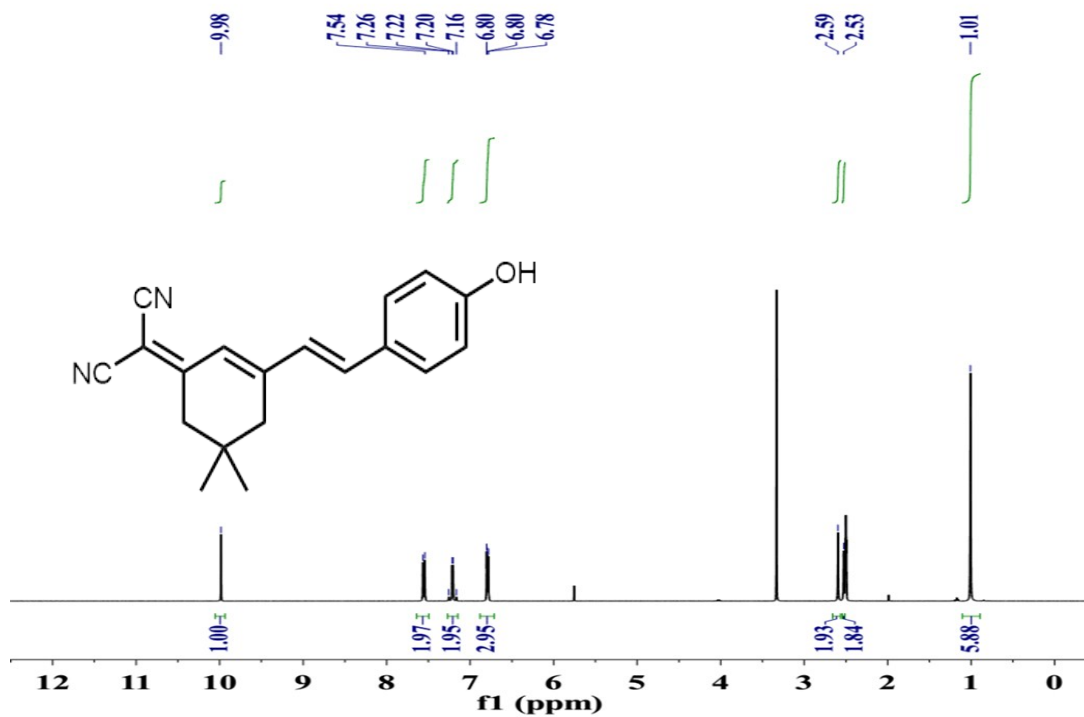

Figure S23. <sup>1</sup>H NMR spectra of NDCM-OH in DMSO-d<sub>6</sub>

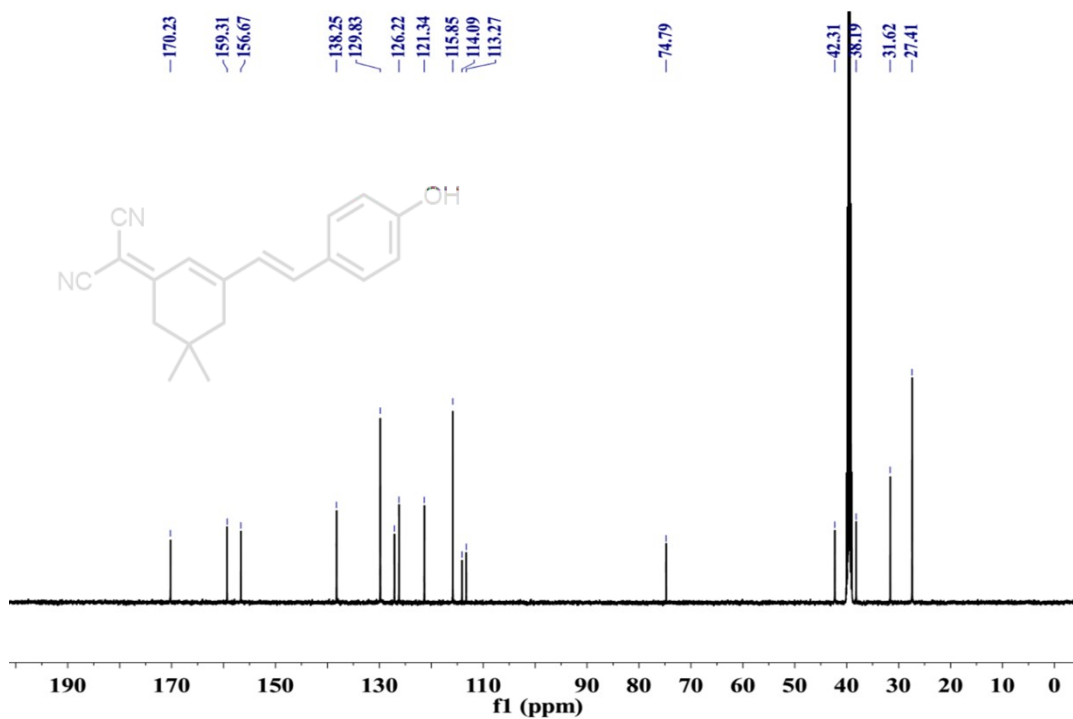

Figure S24. <sup>13</sup>C NMR spectra of NDCM-OH in DMSO-d<sub>6</sub>

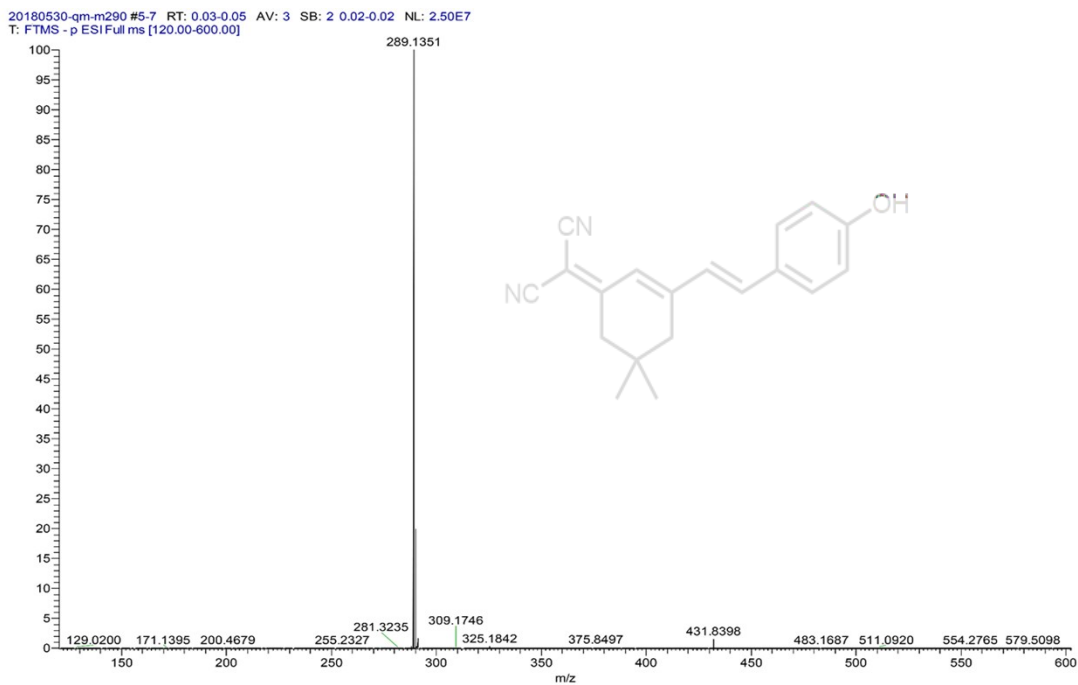

Figure S25. HRMS spectra of NDCM-OH

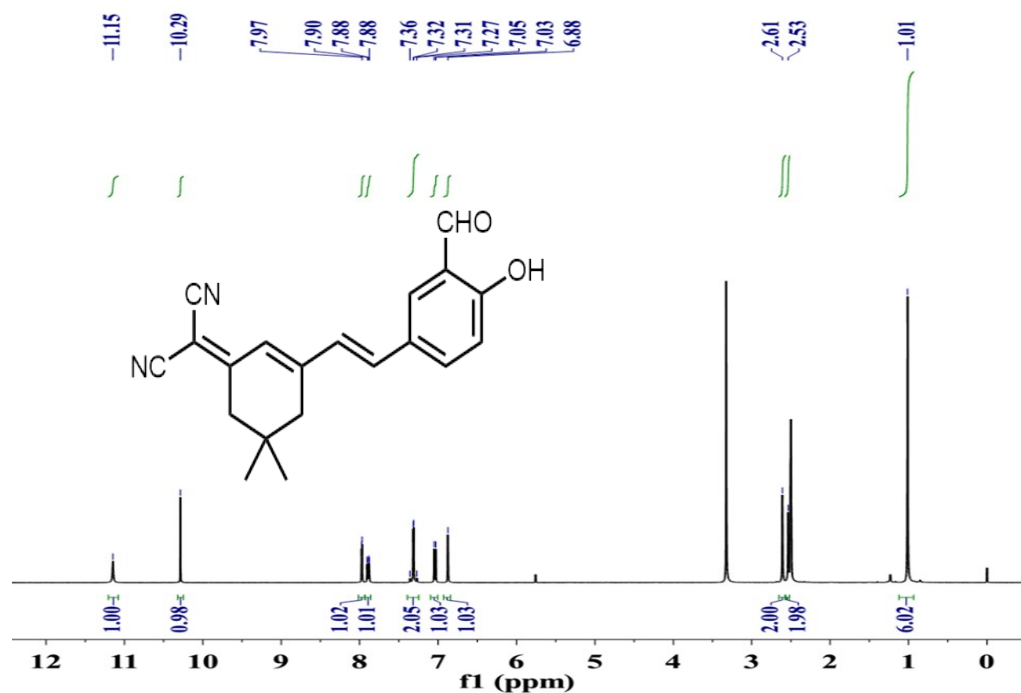

Figure S26. <sup>1</sup>H NMR spectra of NDCM-OH in DMSO-d<sub>6</sub>

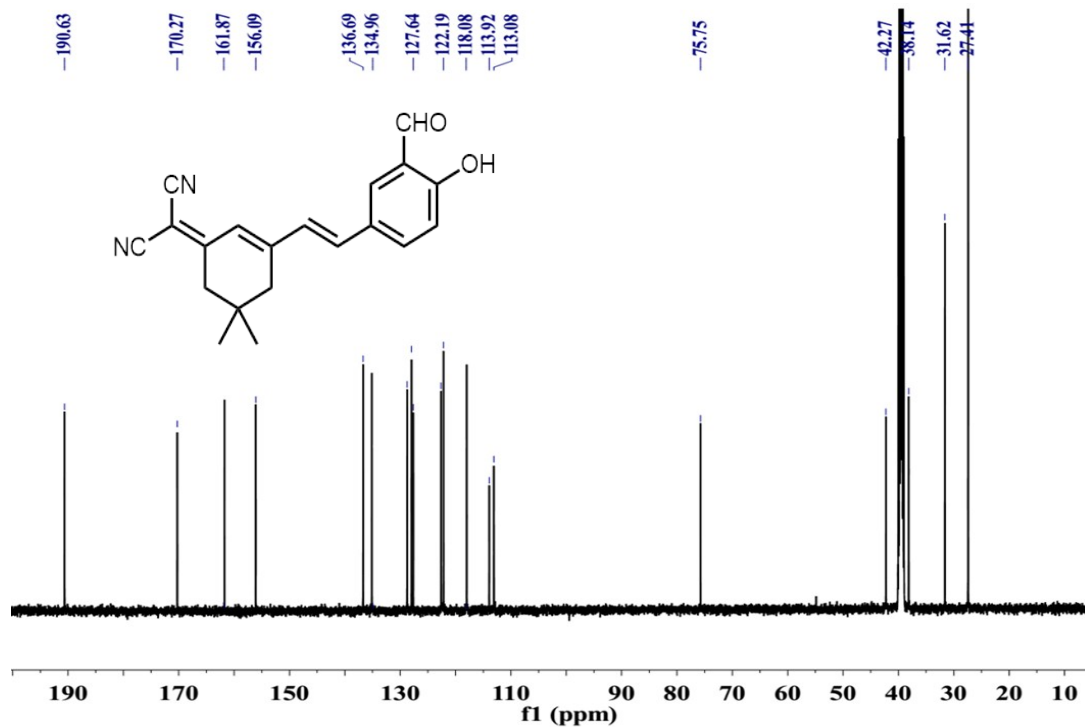

Figure S27. <sup>13</sup>C NMR spectra of NDCM-CHO-OH in DMSO-d<sub>6</sub>

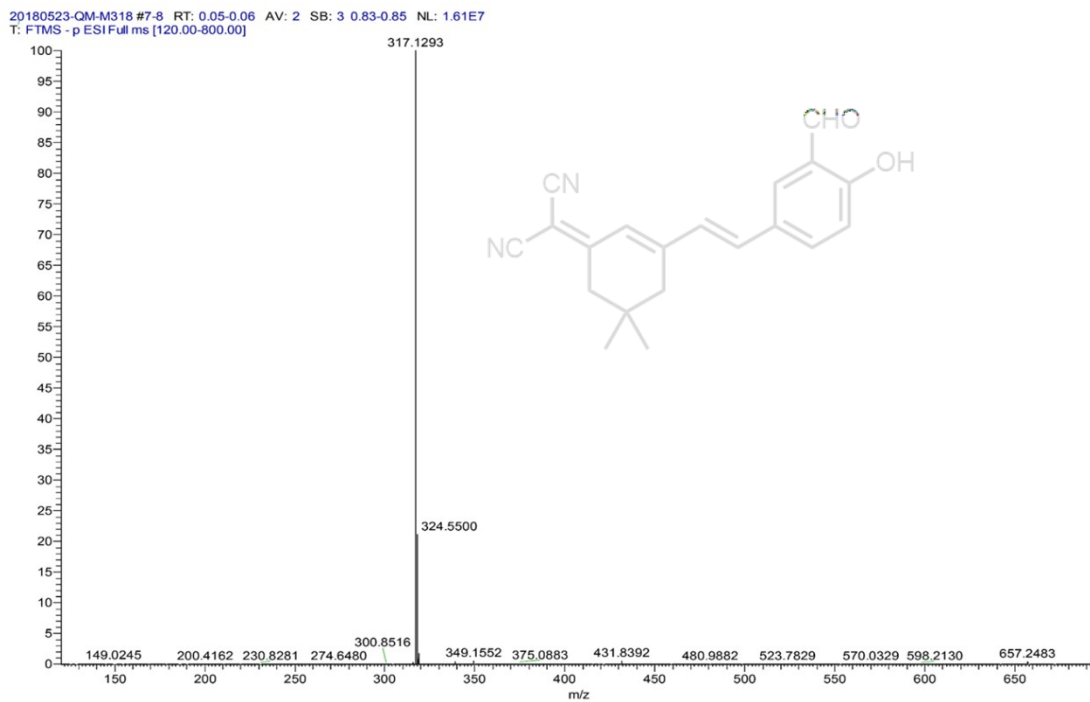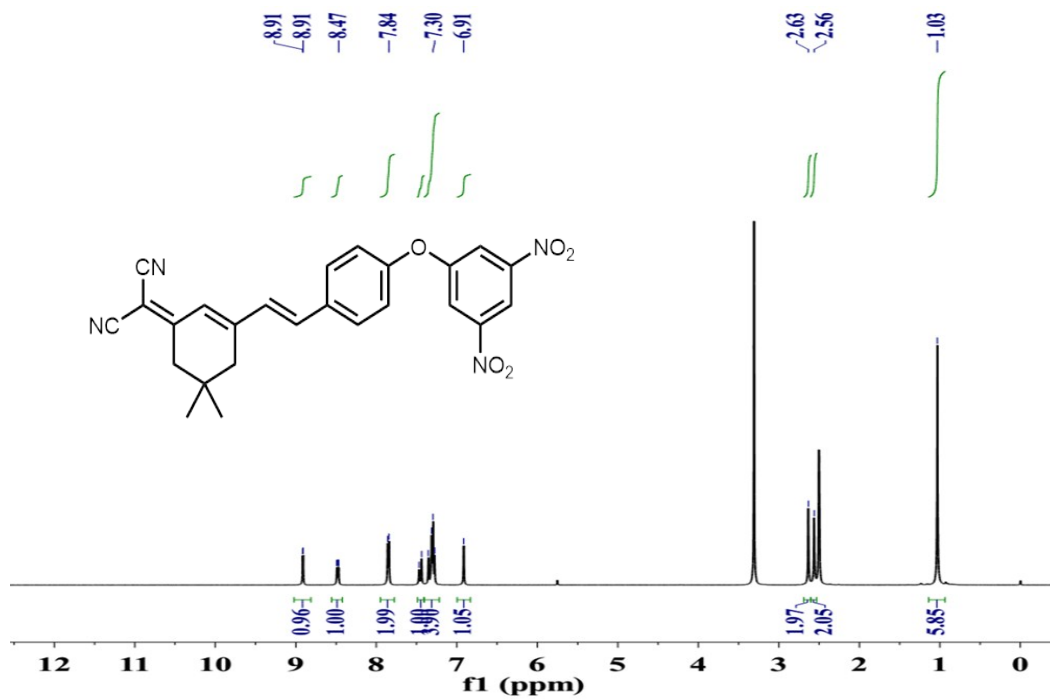

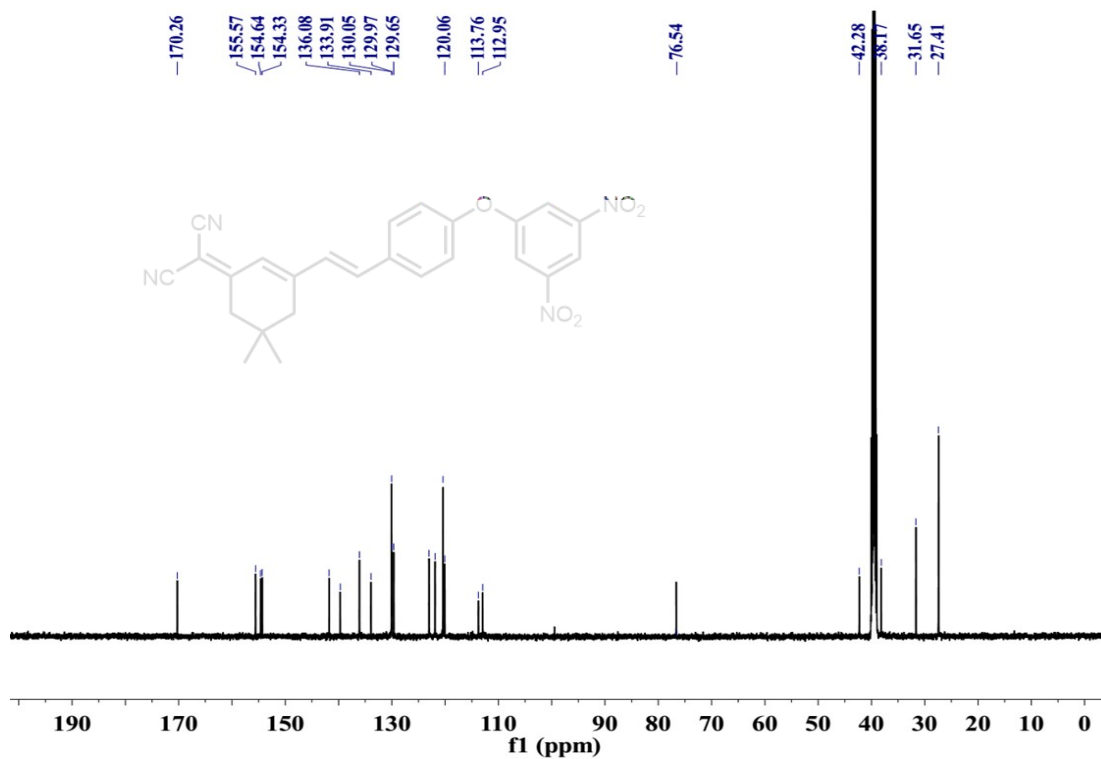

Figure S30. <sup>13</sup>C NMR spectra of NDCM-1 in DMSO-d<sub>6</sub>

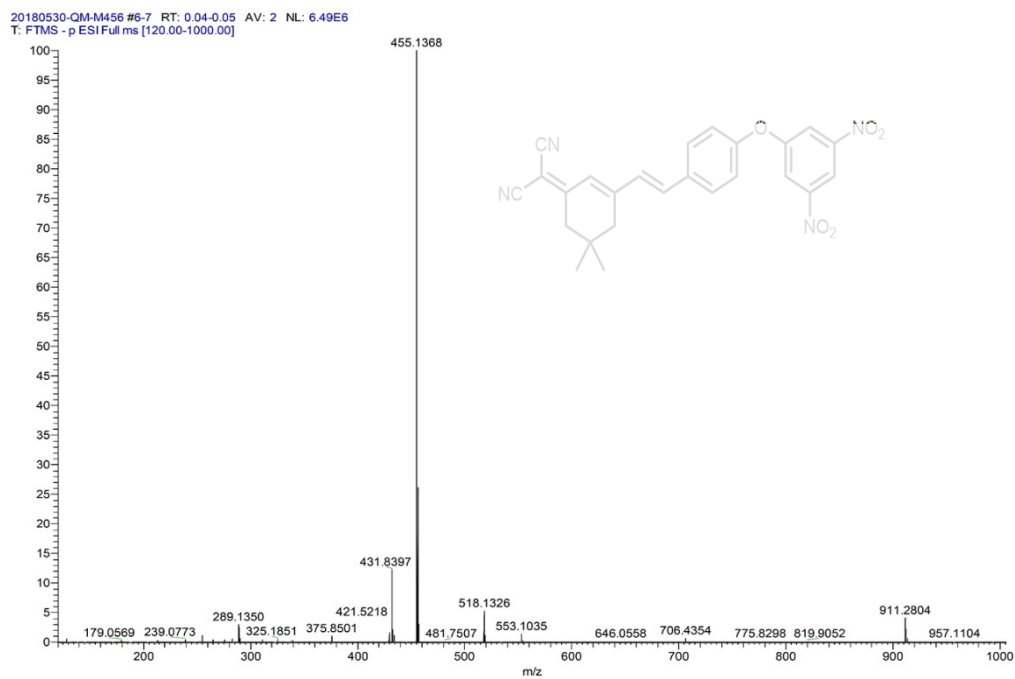

Figure S31. HRMS spectra of NDCM-1



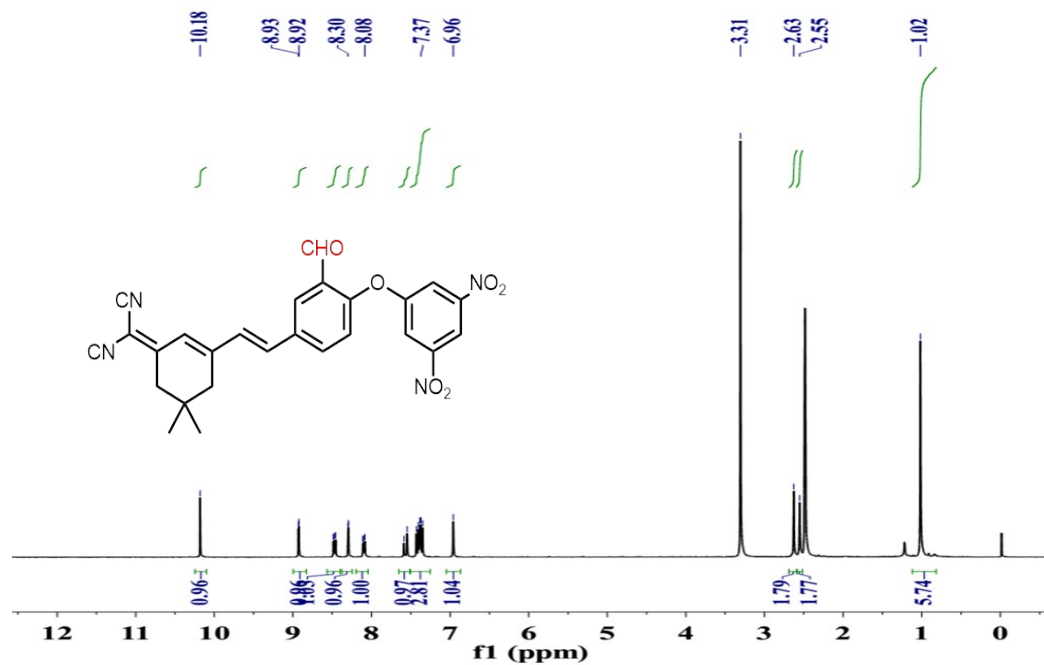

Figure S32.  $^1\text{H}$  NMR spectra of NDCM-2 in  $\text{DMSO-d}_6$

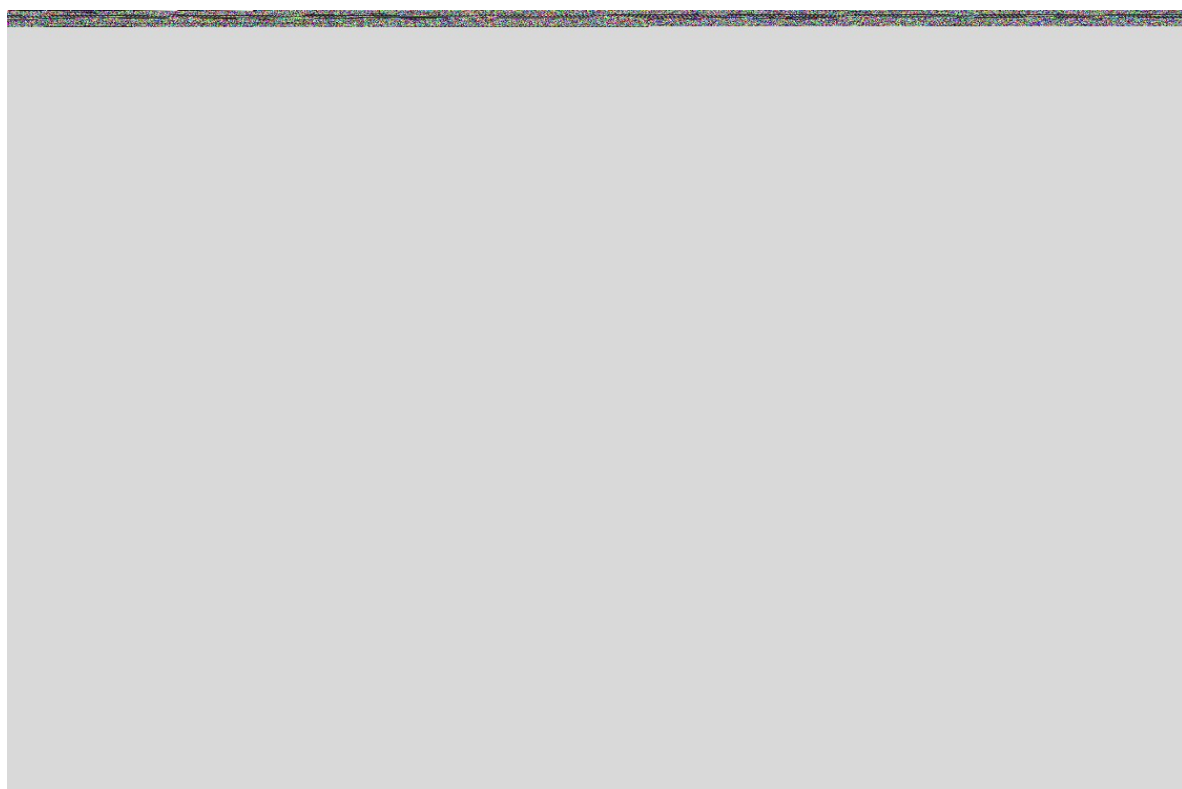

Figure S33.  $^{13}\text{C}$  NMR spectra of NDCM-2 in  $\text{DMSO-d}_6$

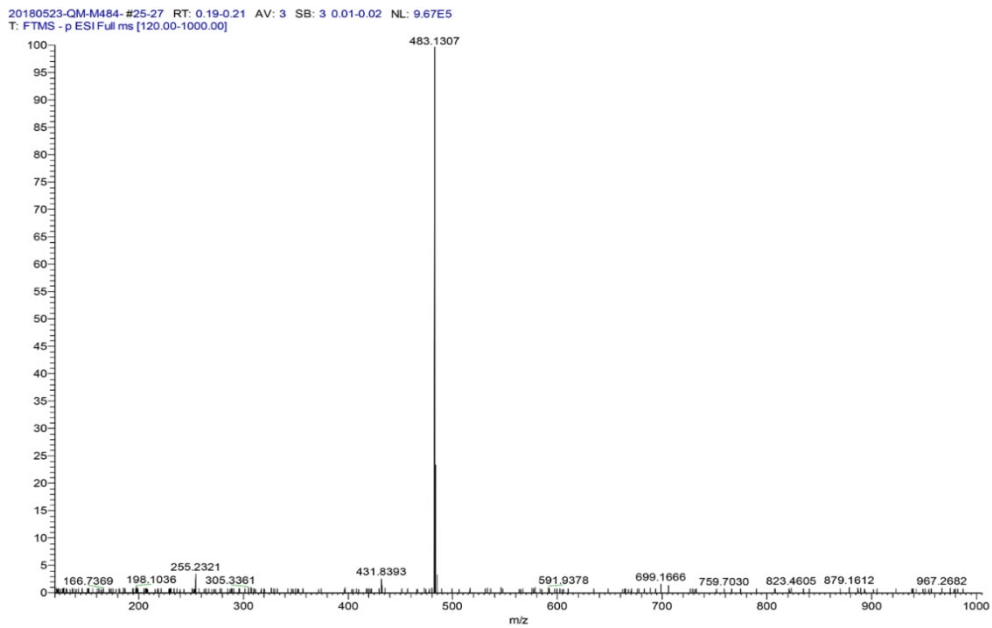

**Figure S34.** HRMS spectra of NDCM-2
